# Supplementary material
Source: Springer Nature journal article supplement (https://www.springermedizin.de/resource/supplementary/12913_2011_1966_MOESM1_ESM.pdf/9529626)

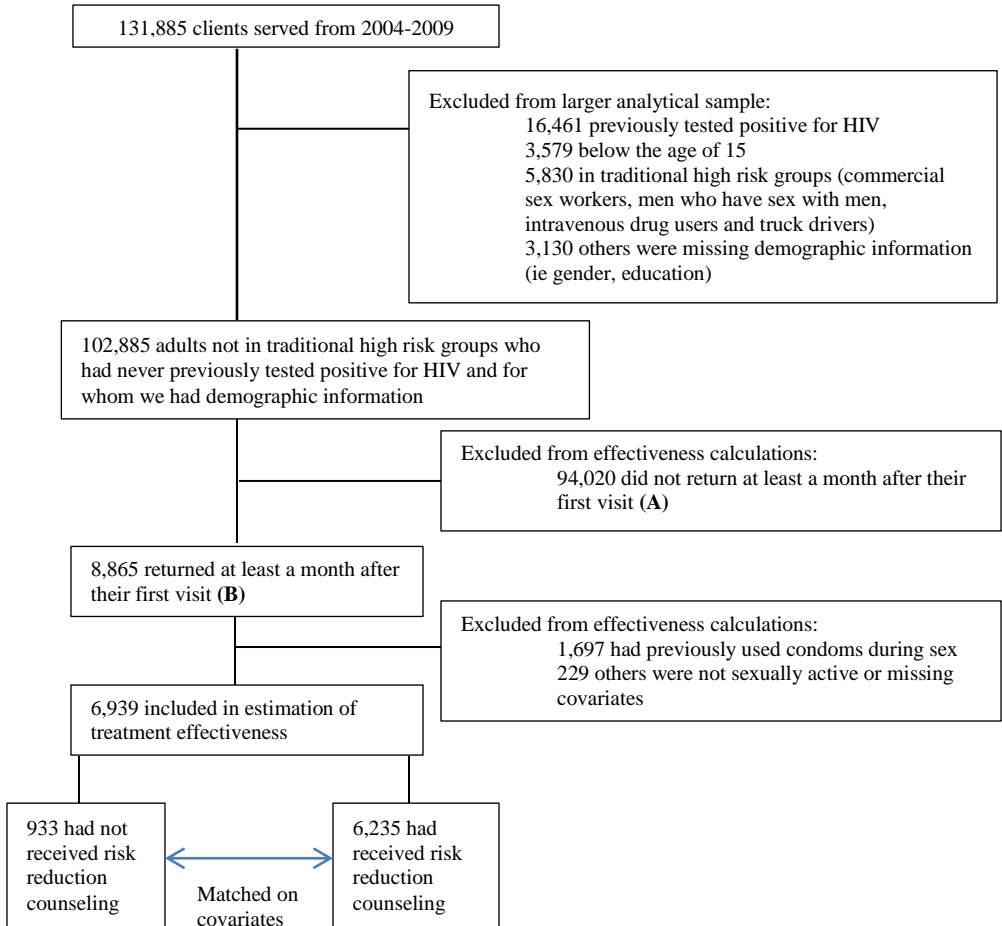

**Note:** Groups (A) and (B) are compared in Table 1

Supplement: MOESM1 [file 9529626]
